# Supplementary material for: Synthesis of novel liquid crystalline and fire retardant molecules based on six-armed cyclotriphosphazene core containing Schiff base and amide linking units
Source: Royal Society of Chemistry journal article supplement (doi:10.1039/d0ra03812a), 2020-01-01
Supplement: d0ra03812a1.pdf [file d0ra03812a1.pdf]

### Electronic Supplementary Information (ESI) – DSC thermogram of compounds 5a-e

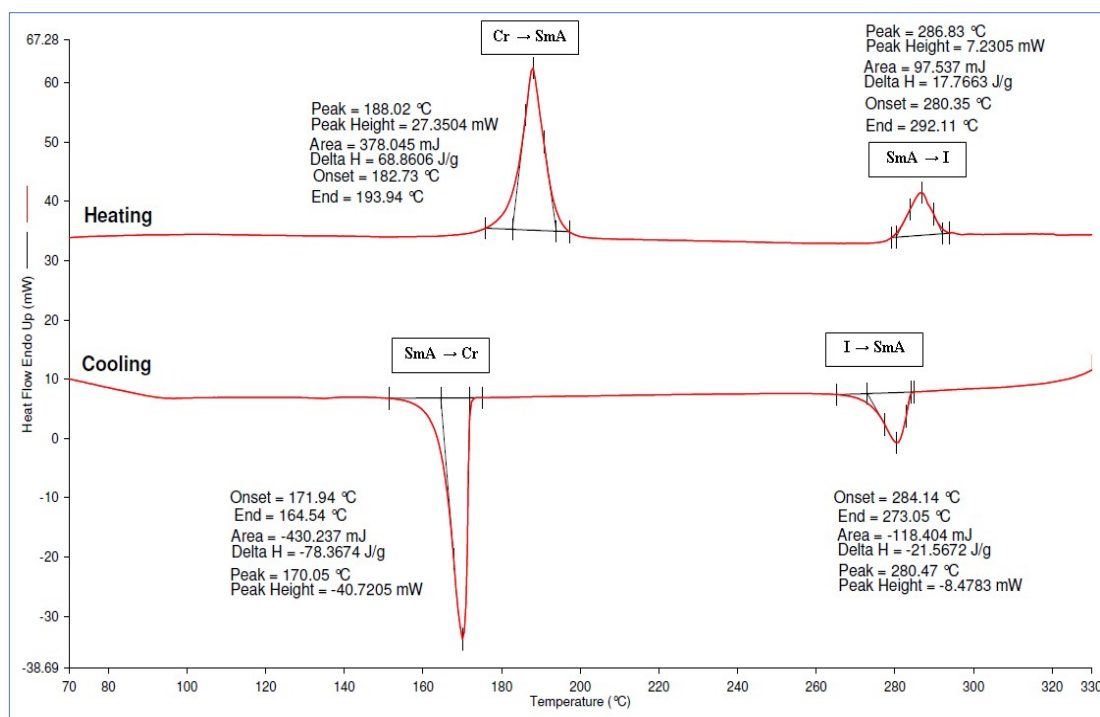

Figure ESI1. DSC thermogram of compound 5a

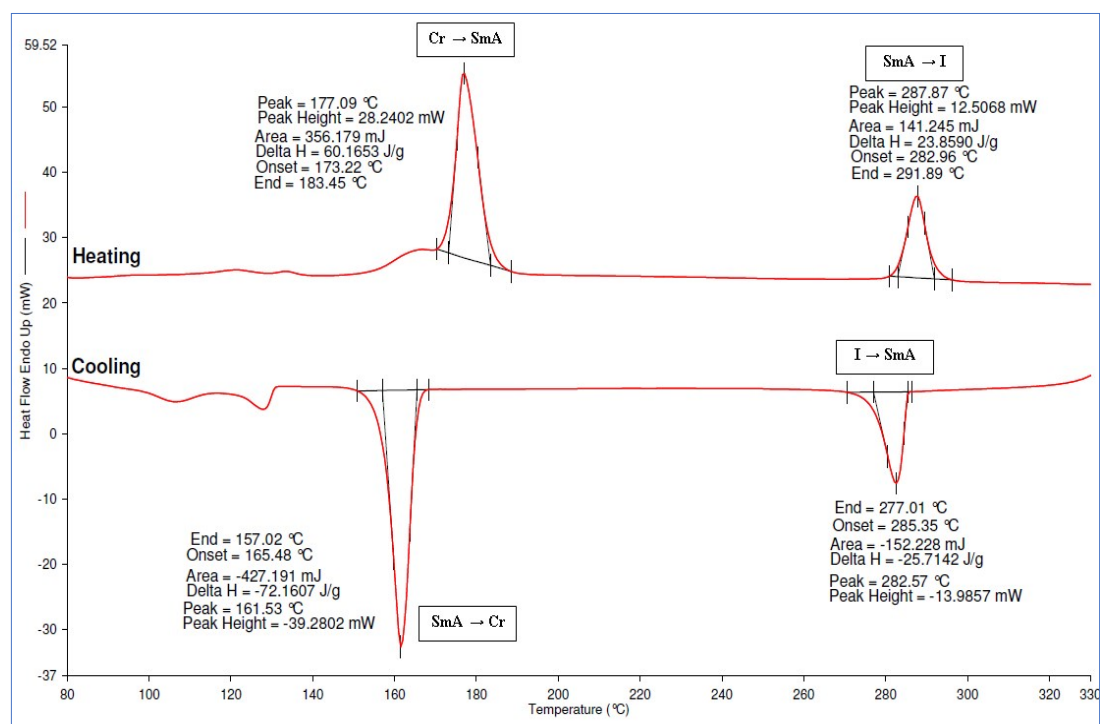

Figure ESI2. DSC thermogram of compound 5b

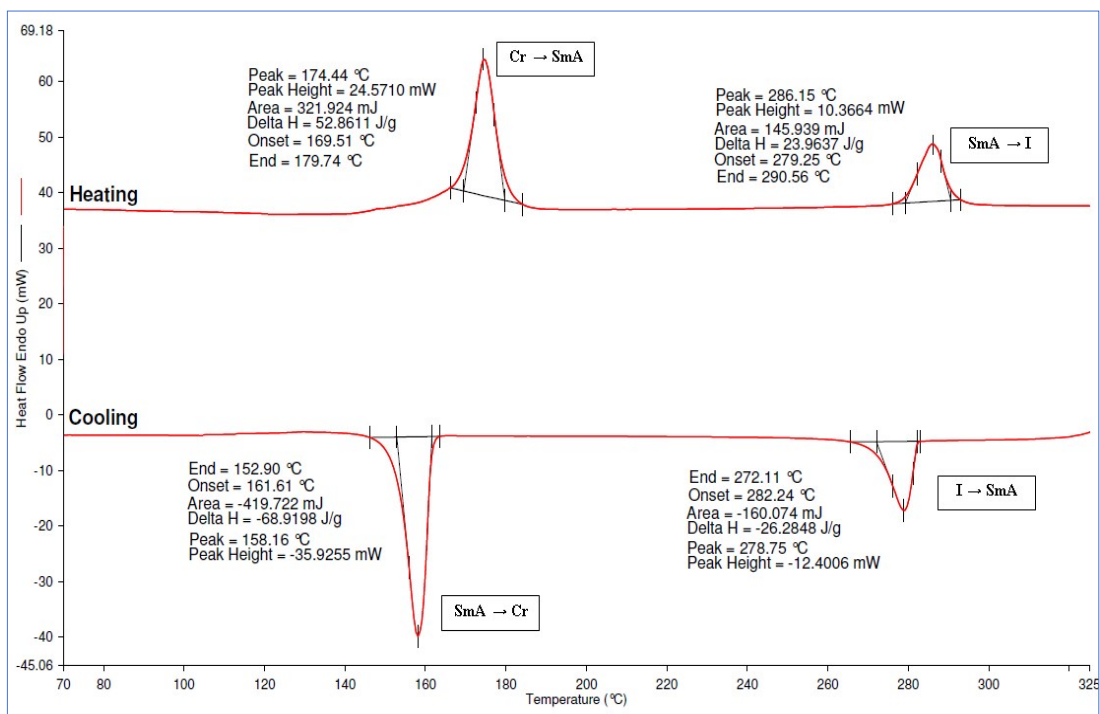

Figure ESI3. DSC thermogram of compound 5c

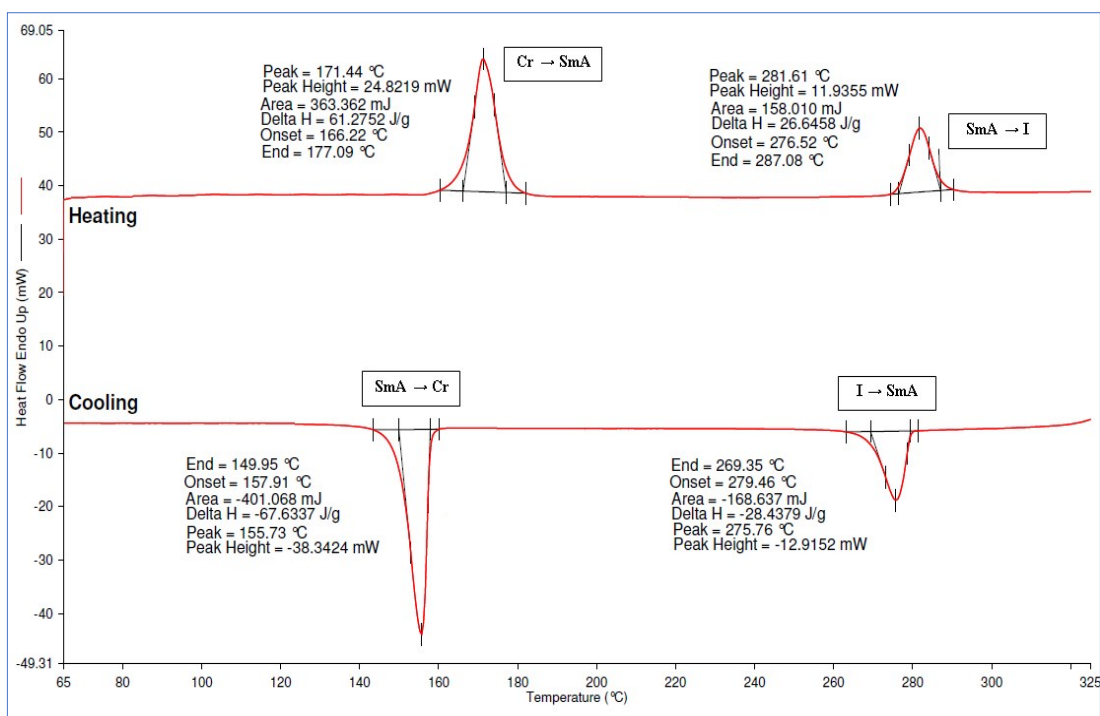

Figure ESI4. DSC thermogram of compound 5d

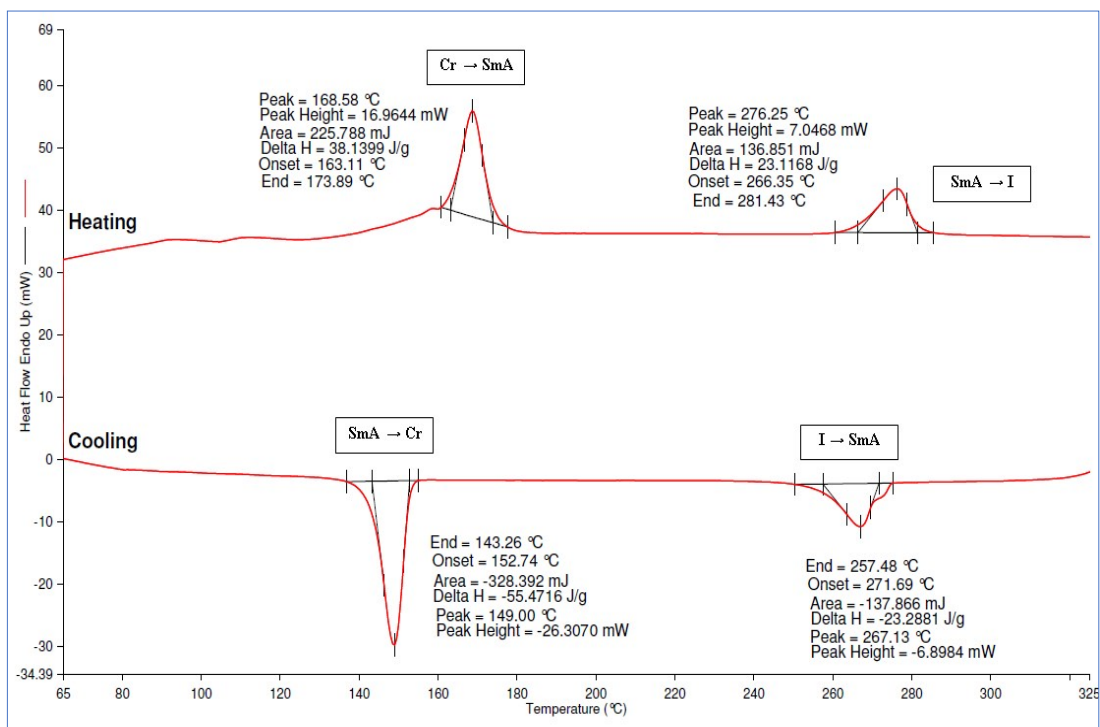

Figure ES15. DSC thermogram of compound 5e
